# Supplementary material
Source: Springer Nature journal article supplement (https://www.springermedizin.de/resource/supplementary/12906_2006_117_MOESM2_ESM.pdf/9524086)

# Changes in Affective Distress in Moderately vs. Highly Compliant Meditators

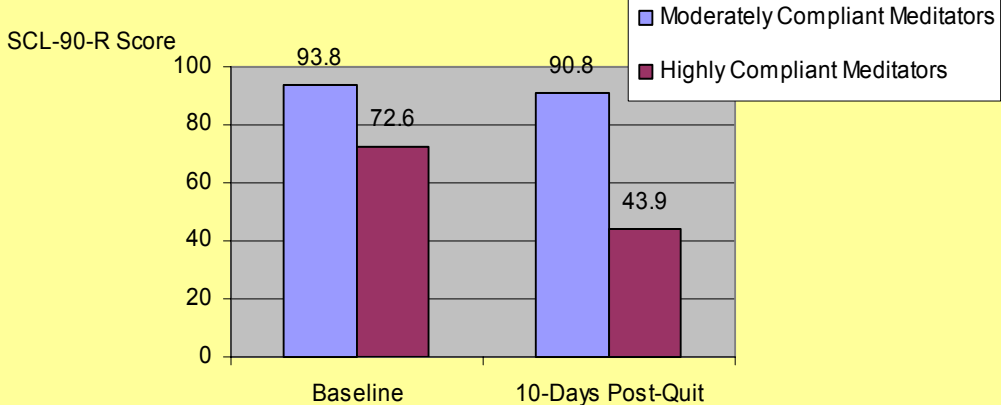

Supplement: MOESM2 [file 9524086]
